# Supplementary material for: Improving the revenue of lignin conversion into carbon dots by prior amino modification
Source: Royal Society of Chemistry journal article supplement (doi:10.1039/d3gc04669a), 2024-01-01
Supplement: d3gc04669a1.pdf [file d3gc04669a1.pdf]

# Improving revenue of lignin conversion into carbon dots by prior amino modification

*Tingting Chu,<sup>a</sup> Xiaoxu Yang,<sup>a</sup> Mingjie Chen,<sup>\*abc</sup> Qing-Shan Shi,<sup>\*b</sup> Xiaobao Xie<sup>\*b</sup> and Yanzhu Guo<sup>\*a</sup>*

<sup>a</sup> Liaoning Key Lab of Lignocellulose Chemistry and BioMaterials, Liaoning Collaborative Innovation Center for Lignocellulosic Biorefinery, College of Light Industry and Chemical Engineering, Dalian Polytechnic University, Dalian 116034, China.

<sup>b</sup> Key Laboratory of Agricultural Microbiomics and Precision Application (MARA), Guangdong Provincial Key Laboratory of Microbial Culture Collection and Application, Key Laboratory of Agricultural Microbiome (MARA), State Key Laboratory of Applied Microbiology Southern China, Institute of Microbiology, Guangdong Academy of Sciences, Guangzhou 510070, People's Republic of China.

<sup>c</sup> Guangdong Dimei New Materials Technology Co. Ltd. 100 Central Xianlie Road, Guangzhou 510070, China.

\* Email address: chenmj@gdim.cn (M. C.); shiqingshan@hotmail.com (Q.-S. S.); xiexb@gdim.cn (X. X.); guoyz@dlpu.edu.cn (Y. G.)

## Section Schemes

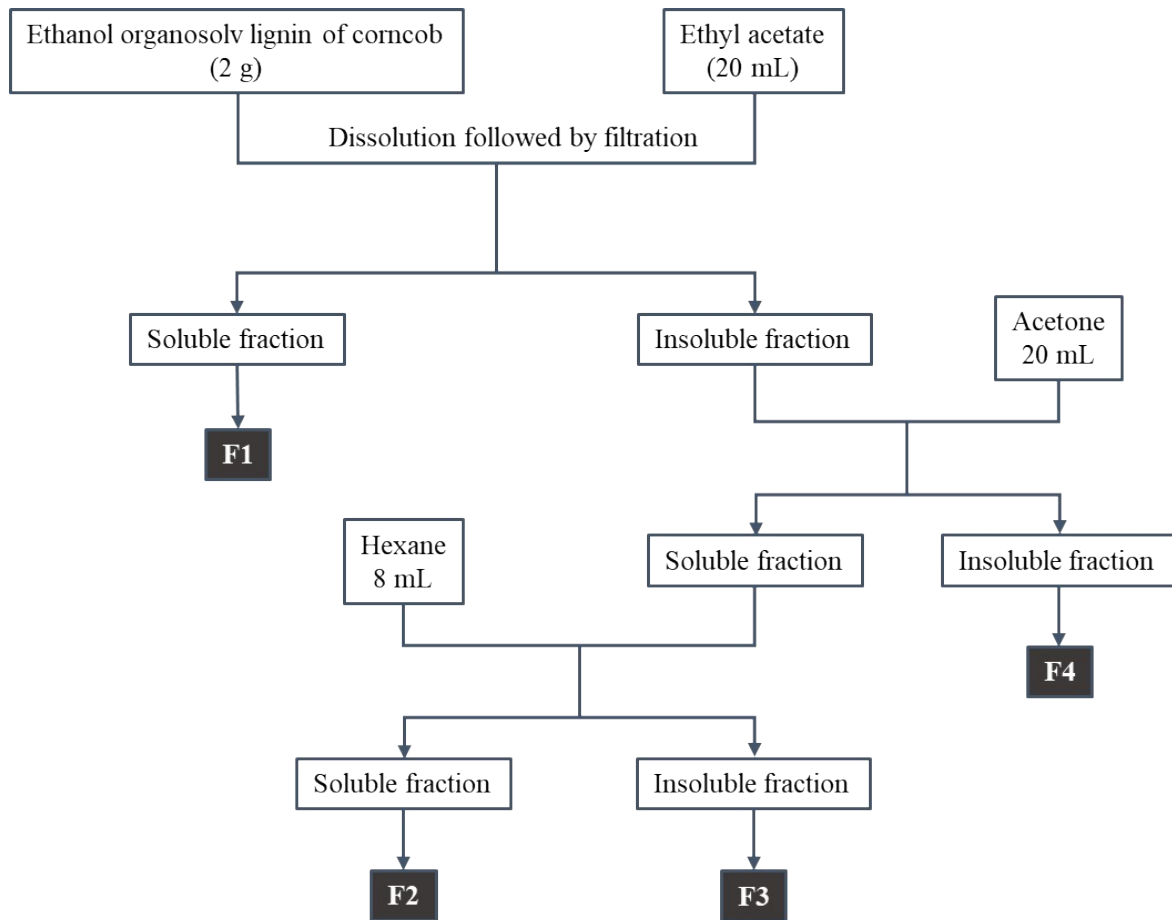

**Scheme S1** Fractionation of ethanol organosolv lignin of corncob

### A) CDs production from raw lignin

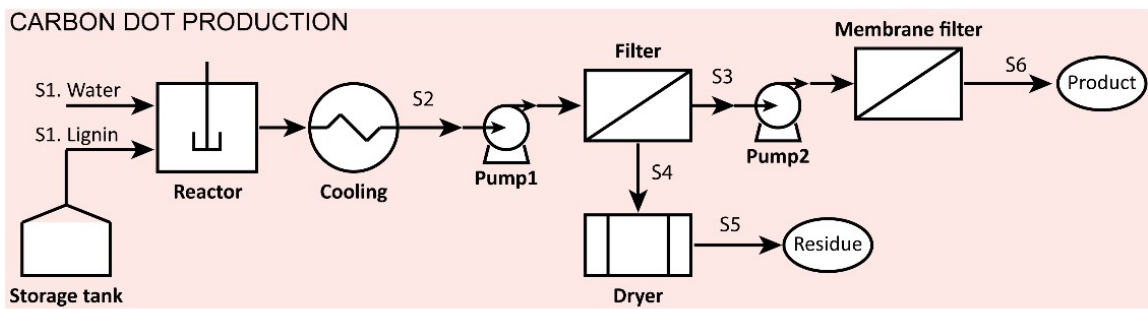

### B) CDs production from Modified lignin

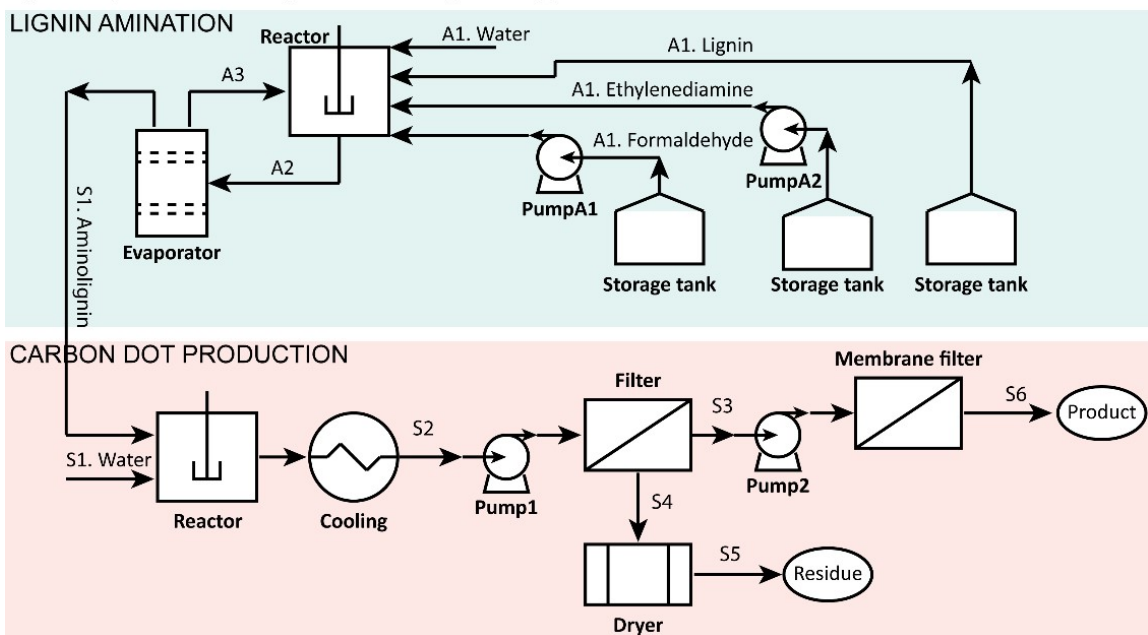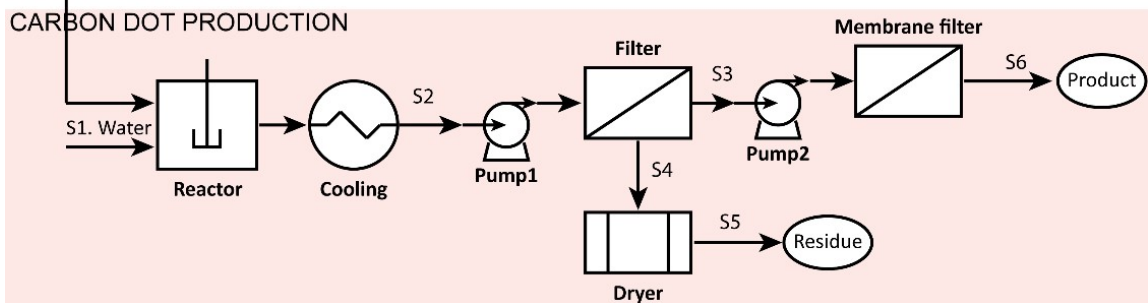

**Scheme S2.** Process diagram of industrial-scale carbon dots production from raw lignin, and modified lignin.

## Section Figures

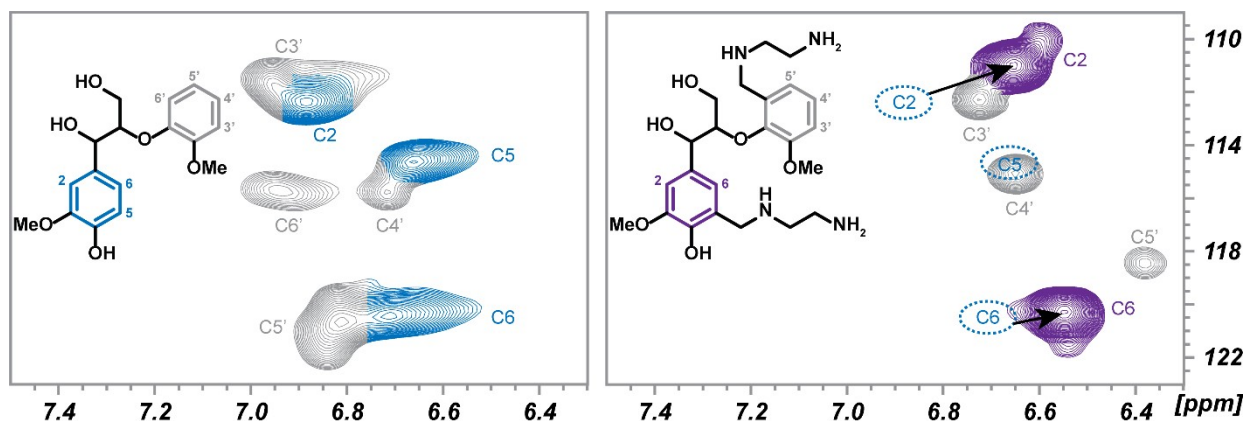

**Fig. S1** The HSQC NMR of lignin model compound of the  $\beta$ -O-4 dimer, and the modified  $\beta$ -O-4 dimer by Mannich reactions with ethylenediamine. The reaction between  $\beta$ -O-4 dimer and ethylenediamine was performed by mixing the  $\beta$ -O-4 dimer (0.55 mmol), formaldehyde (1.1 mmol), and ethylenediamine (1.1 mmol) at room temperature for 24 h. Then the isolation was performed by extraction with ethyl acetate, then evaporation, and vacuum dried at 50 °C.

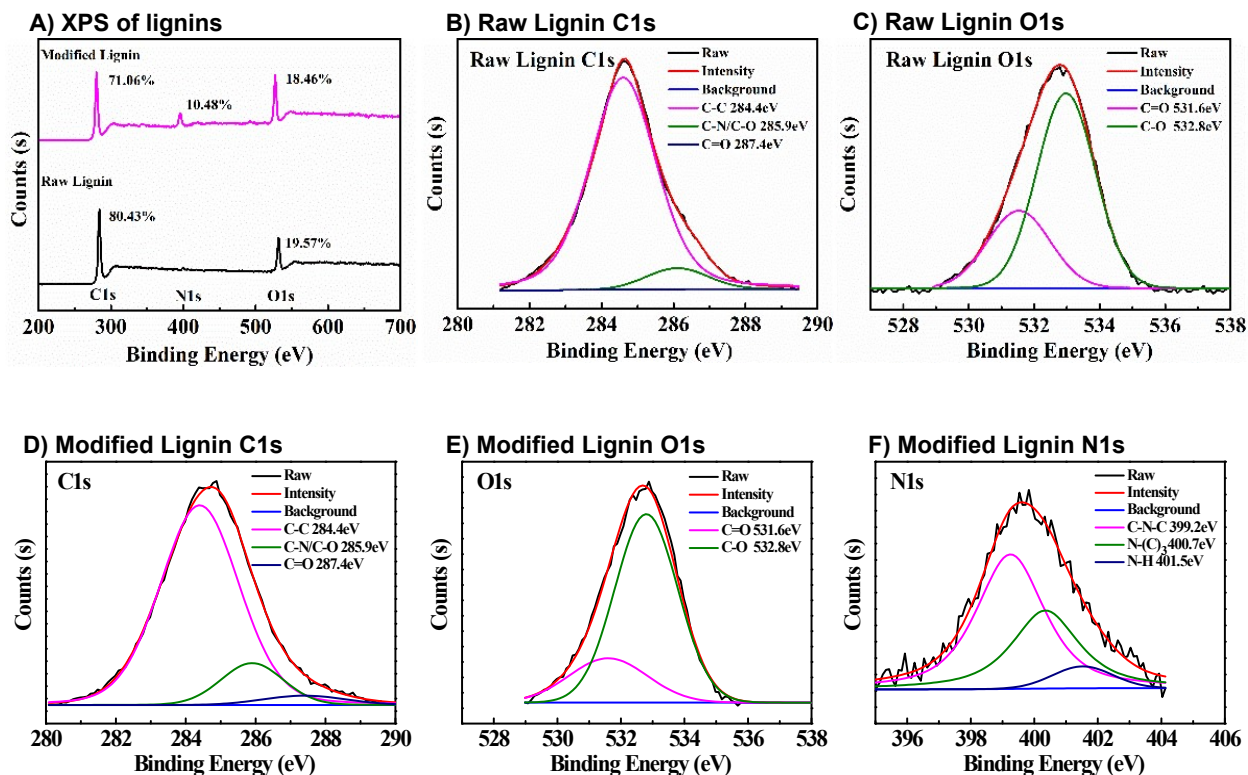

**Fig. S2** XPS studies of the raw lignin and modified lignin by Mannich reaction. The results indicated nitrogen was covalently bonded onto lignin.

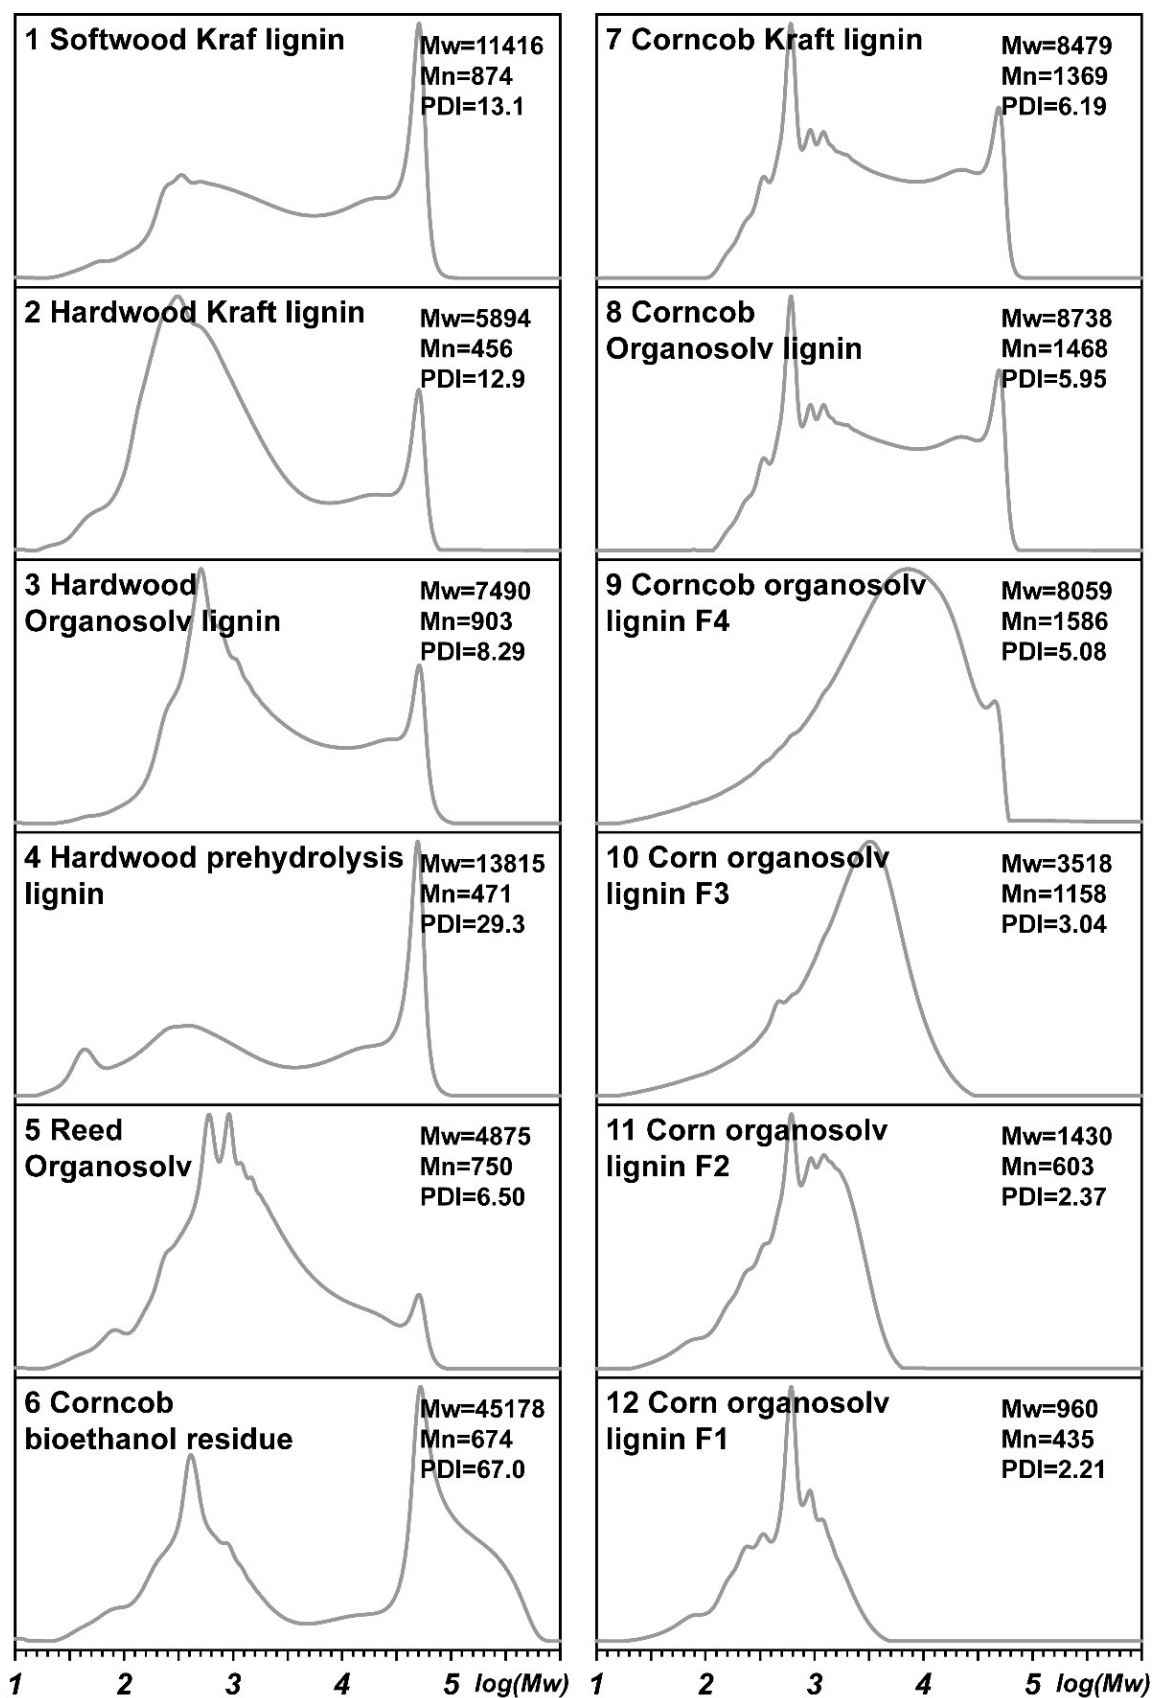

Fig. S3 Molecular weight of lignin by GPC study.

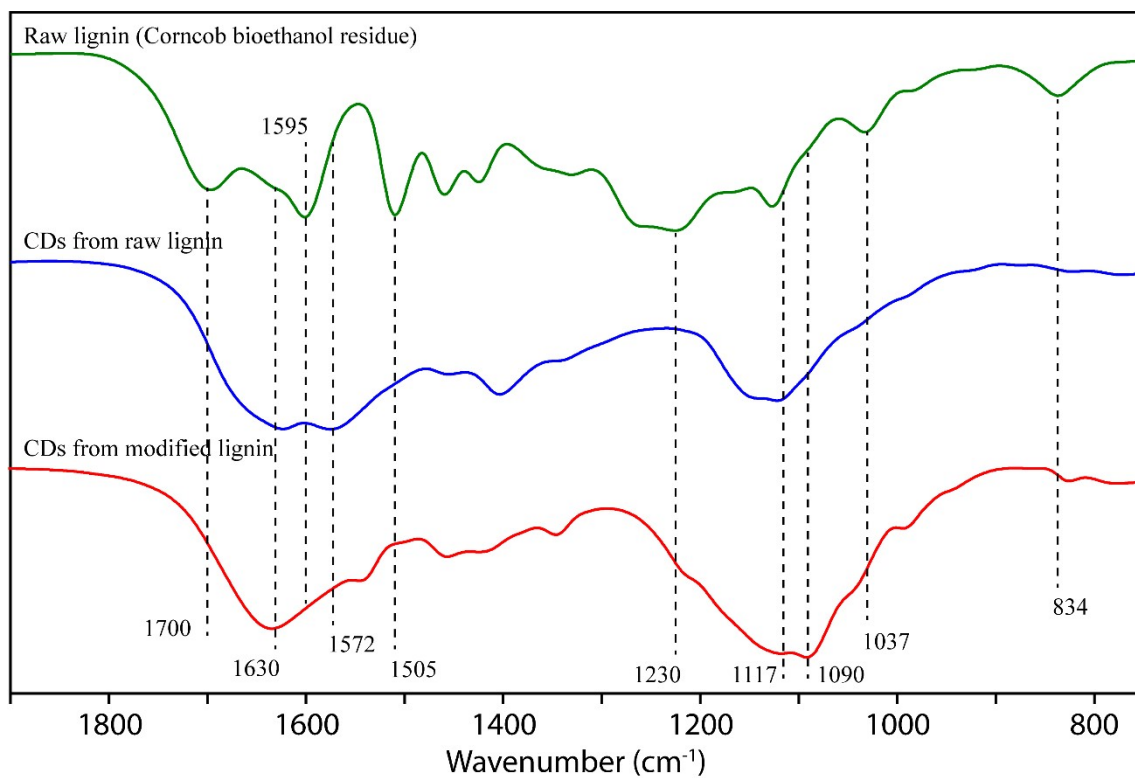

**Fig. S4** FTIR spectra of lignin and CDs.

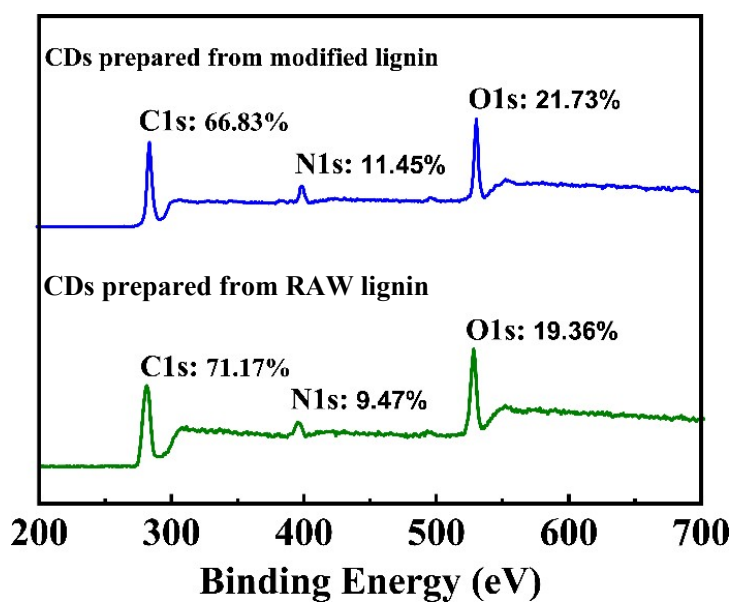

**Fig. S5** XPS result of as-prepared CDs

**A) CDs prepared from modified lignin**

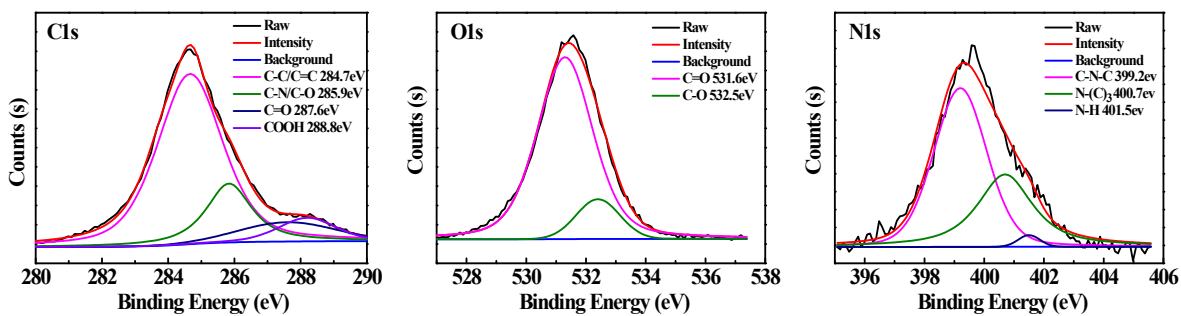

**B) CDs prepared from RAW lignin**

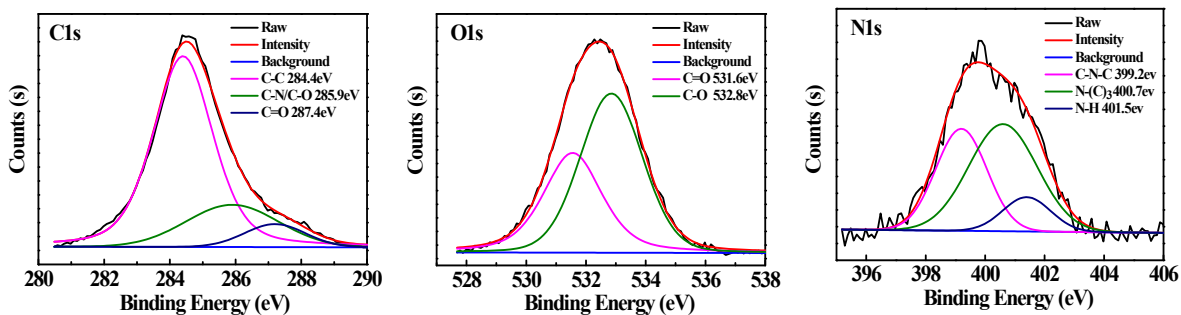

**Fig. S6** Deconvolution of the XPS peaks of CDs.

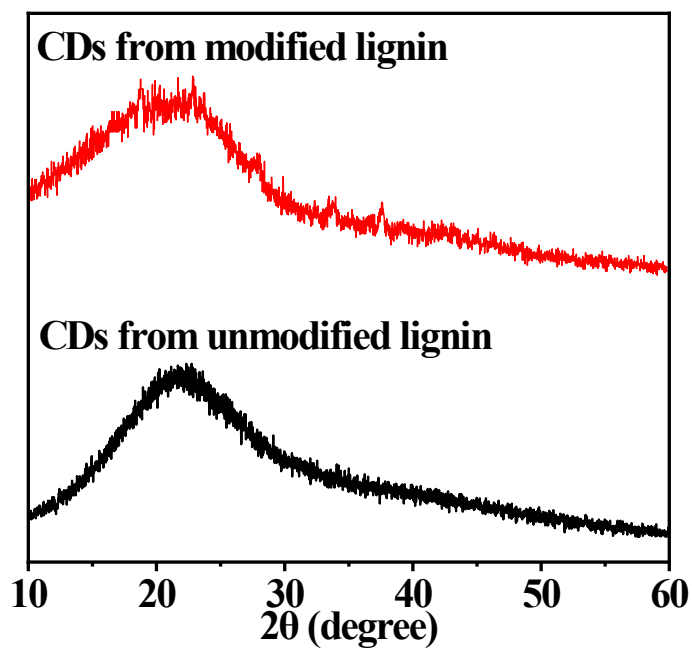

**Fig. S7** XRD patterns of CDs.

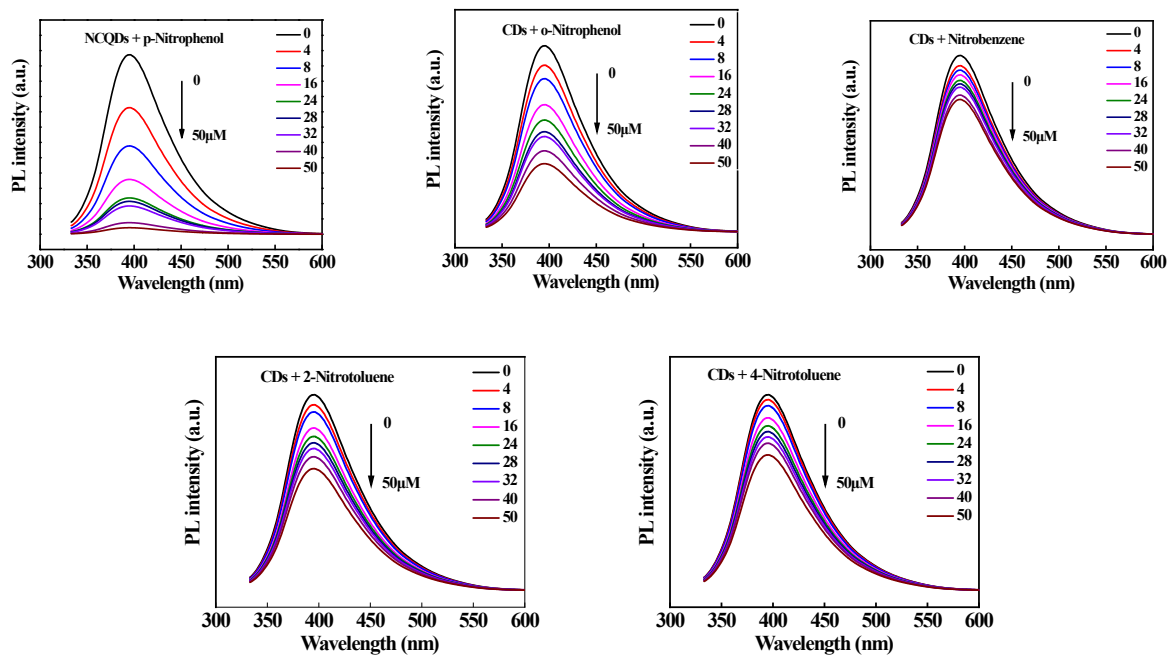

**Fig. S8** Photoluminescence spectra of CDs solutions with different concentrations of nitroaromatic compounds

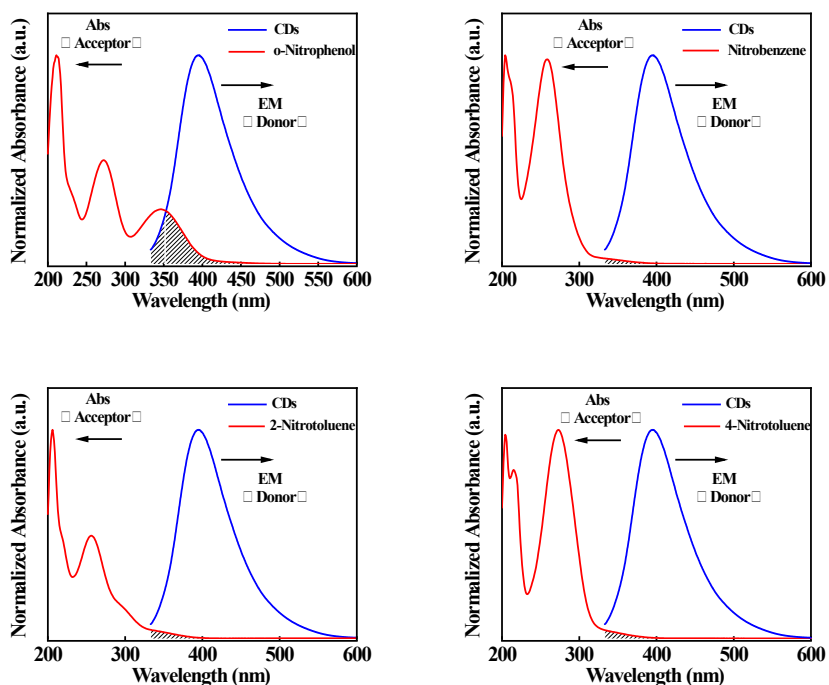

**Fig. S9** The overlapped absorption spectrum of nitroaromatic compounds and fluorescence emission spectrum of CDs



## Section Tables

**Table S1** The yield and QY of CDs by previous reports.

| Lignin source                          | Method    | Synthetic methods                                                                            | Yield /%  | QY /%      | Ref  |
|----------------------------------------|-----------|----------------------------------------------------------------------------------------------|-----------|------------|------|
| Alkali lignin/Citric acid (0.1g/7g)    | Bottom up | Hydrothermal method with ethylenediamine                                                     | --        | 43         | [1]  |
| Alkali lignin                          | Bottom up | 1. HNO <sub>3</sub> treatment<br>2. hydrothermal method                                      | 21        | 22         | [2]  |
| Lignin                                 | Bottom up | Oxidative hydrothermal with H <sub>2</sub> O <sub>2</sub>                                    | 0.8-12.06 | --         | [3]  |
| Alkali lignin (TCI)                    | Bottom up | 0.1 g Lignin+0.6ml EDA+9.4 H <sub>2</sub> O                                                  | 82.4      | <17        | [4]  |
| Biorefinery residue                    | Bottom up | Ethanol solvothermal method                                                                  | --        | 1.68-2.47  | [5]  |
| Pre-hydrolyzed lignin                  | Bottom up | 0.075 g Lignin + 3 g sulfuric acid + 10 mL H <sub>2</sub> O                                  | --        | 2.7-13.5%  | [6]  |
| Alkali Lignin                          | Top-Down  | 1. Carbonization with DES<br>2. Ball mill                                                    | --        | 7.95       | [7]  |
| Lignin amines                          | Top-Down  | 1. Carbonization<br>2. Ball mill                                                             | --        | 8.1        | [8]  |
| Alkali lignin                          | Bottom up | Hydrothermal with ammonia water                                                              | --        | 1.49-14.24 | [9]  |
| Alkali lignin                          | Bottom up | 1. Hydrothermal<br>2. 30ml H <sub>2</sub> SO <sub>4</sub> +HNO <sub>3</sub>                  | --        | 17.3       | [10] |
| Sodium lignosulfonate/Citric acid      | Bottom up | Hydrothermal with 10 mg/mL NaOH solution                                                     | --        | 23.3       | [11] |
| Alkali lignin                          | top-down  | 1. Carbonization<br>2. Oxidation H <sub>2</sub> SO <sub>4</sub> :HNO <sub>3</sub> = 3:1, v/v | 6-7       | 8.1-13.0   | [12] |
| Lignosulfonate                         | Bottom up | Microwave irradiation method                                                                 | 2.39-5.02 | 31.27      | [13] |
| Lignin corncob/Citric acid (0.1g/2.1g) | Bottom up | Hydrothermal with EDA                                                                        | --        | 43.9       | [14] |
| Lignin                                 | Top-down  | 1. Hydrothermal method<br>2. NaOH/O <sub>2</sub> oxidation                                   | 42.5      | 10.0       | [15] |

**Table S2** The yield and QY of CDs derived from biomass other than lignin

| Carbon source          | Method    | Synthetic methods                                                                            | Yield         | QY            | Ref  |
|------------------------|-----------|----------------------------------------------------------------------------------------------|---------------|---------------|------|
| Lignocellulose residue | Bottom up | Solid acid catalyzed DMF solvothermal method                                                 | --            | 2.7           | [16] |
| Pine wood              | Bottom up | Hydrothermal                                                                                 | --            | 4.69          | [17] |
| Hemicellulose          | Top-down  | 1. Hydrothermal carbonization<br>2. NaOH/O <sub>2</sub> oxidation                            | 16.9-<br>29.1 | 2.8-<br>16.6  | [15] |
| Cellulose              | Top-down  | 1. Hydrothermal carbonization<br>2. NaOH/O <sub>2</sub> oxidation                            | 34.0          | 13.4          | [15] |
| Chitosan               | Top-down  | 1. Hydrothermal carbonization<br>2. NaOH/O <sub>2</sub> oxidation                            | 33.5          | 11.5          | [15] |
| Cabbage                | Bottom up | hydrothermal                                                                                 | 7.067         | 16.5          | [18] |
| Cellulose (MCC)        | Bottom up | 1. Dissolved with NaOH/Urea<br>2. Hydrothermal treatment of the cellulose NaOH/Urea solution | <6            | <11           | [19] |
| Cellulose              | Bottom up | Microwave assisted hydrothermal method                                                       | --            | 6.20          | [20] |
| Protein                | Bottom up | Microwave assisted hydrothermal method                                                       | --            | 6.81          | [20] |
| Peanut shell           | Bottom up | Microwave assisted hydrothermal method                                                       | --            | 2.83          | [20] |
| Cotton stalk           | Bottom up | Microwave assisted hydrothermal method                                                       | --            | 2.95          | [20] |
| Soymeal                | Bottom up | Microwave assisted hydrothermal method                                                       | --            | 4.92          | [20] |
| Tannic acid            | Bottom up | Microwave-assisted hydrothermal method with 25% ammonia solution                             | --            | 2.1-<br>19.15 | [21] |

**Table S3** DFRC results, and phenolic hydroxyl content by potentiometric titration of lignins

| Lignins                       | G units<br>$\mu\text{mol/g}$ | S units<br>$\mu\text{mol/g}$ | Total (S+G)<br>$\mu\text{mol/g}$ | S/G  | Phenolic -OH<br>$\text{mmol/g}$ |
|-------------------------------|------------------------------|------------------------------|----------------------------------|------|---------------------------------|
| Corncob bioethanol residue    | 23.0 $\pm$ 1.0               | 27.4 $\pm$ 0.6               | 50.3 $\pm$ 1.6                   | 1.19 | 1.29                            |
| Hardwood prehydrolysis lignin | 5.09 $\pm$ 0.09              | 13.8 $\pm$ 0.4               | 18.8 $\pm$ 0.3                   | 2.70 | 1.53                            |
| Softwood Kraft lignin         | 40.9 $\pm$ 1.3               | 0                            | 40.9 $\pm$ 1.3                   | 0    | 1.50                            |
| Hardwood Kraft lignin         | 35.8 $\pm$ 0.6               | 23.1 $\pm$ 5.0               | 58.9 $\pm$ 5.6                   | 0.64 | 1.88                            |
| Hardwood organosolv lignin    | 159 $\pm$ 3                  | 158 $\pm$ 2                  | 317 $\pm$ 5                      | 0.99 | 1.47                            |
| Reed organosolv lignin        | 78.0 $\pm$ 1.4               | 60.5 $\pm$ 2.8               | 138 $\pm$ 4                      | 0.78 | 1.62                            |
| Corncob Kraft lignin          | 15.7 $\pm$ 0.7               | 18.8 $\pm$ 1.7               | 34.5 $\pm$ 2.4                   | 1.20 | 1.03                            |
| Corncob organosolv lignin     | 16.4 $\pm$ 0.9               | 15.2 $\pm$ 1.1               | 31.6 $\pm$ 2.0                   | 0.92 | 1.76                            |
| Corncob organosolv lignin F1  | 3.11 $\pm$ 0.34              | 17.1 $\pm$ 2.3               | 20.2 $\pm$ 2.7                   | 5.49 | 2.23                            |
| Corncob organosolv lignin F4  | 10.1 $\pm$ 4.4               | 11.2 $\pm$ 3.8               | 21.3 $\pm$ 8.2                   | 1.12 | 1.28                            |
| Corncob organosolv lignin F3  | 11.2 $\pm$ 0.3               | 10.1 $\pm$ 0.9               | 21.3 $\pm$ 0.6                   | 0.90 | 1.65                            |
| Corncob organosolv lignin F2  | 6.68 $\pm$ 1.02              | 9.99 $\pm$ 1.15              | 16.7 $\pm$ 2.2                   | 1.50 | 1.96                            |

**Table S4** Nitrogen content and water solubility of modified lignin, and the yield and QY of resultant

| Samples                       | Nitrogen Content Wt% |                 | Solubility pH 7 g/L |                 | Solubility at pH 5 g/L |                 | QY %  | Yield wt% |
|-------------------------------|----------------------|-----------------|---------------------|-----------------|------------------------|-----------------|-------|-----------|
|                               | Raw lignin           | Modified lignin | Raw lignin          | Modified lignin | Raw lignin             | Modified lignin |       |           |
| Softwood Kraft lignin         | 0.47                 | 9.72            | 0.65                | 4.70            | 0.27                   | 4.99            | 19.13 | 50.2      |
| Hardwood Kraft lignin         | 0.46                 | 9.27            | 0.08                | 9.63            | 0.27                   | 9.04            | 12.39 | 64.6      |
| Hardwood organosolv lignin    | 0.43                 | 9.44            | 0.69                | 9.32            | 0.32                   | 9.01            | 11.69 | 61.5      |
| Hardwood prehydrolysis lignin | 0.59                 | 9.71            | 0.52                | 10.26           | 0.35                   | 10.10           | 13.89 | 64.4      |
| 5 Reed solvent lignin L6      | 0.56                 | 10.05           | 0.81                | 6.70            | 0.30                   | 6.98            | 20.10 | 53.5      |
| Corn cob bioethanol residue   | 1.11                 | 12.26           | 0.50                | 6.22            | 0.43                   | 7.37            | 36.42 | 68.3      |
| Corn cob Kraft lignin         | 0.62                 | 12.17           | 0.21                | 6.27            | 0.11                   | 7.11            | 36.82 | 72.3      |
| Corn cob organosolv lignin    | 0.58                 | 12.33           | 0.85                | 7.98            | 0.62                   | 9.29            | 32.88 | 67.6      |
| Corn cob organosolv lignin F4 | 0.37                 | 11.85           | 0.65                | 4.70            | 0.22                   | 7.26            | 35.22 | 55.3      |
| Corn cob organosolv lignin F3 | 0.57                 | 11.43           | 0.52                | 10.26           | 0.34                   | 7.70            | 30.30 | 66.1      |
| Corn cob organosolv lignin F2 | 0.72                 | 10.75           | 0.69                | 9.32            | 0.40                   | 9.62            | 21.67 | 63.9      |
| Corn cob organosolv lignin F1 | 0.45                 | 10.28           | 0.08                | 9.63            | 0.43                   | 9.07            | 21.81 | 71.7      |

**Table S5** Estimation of Total product cost & minimum product selling prices of carbon dots production from **RAW lignin**

| <b>Total Product Cost &amp; Minimum Product Selling Prices</b> |               |                                     |
|----------------------------------------------------------------|---------------|-------------------------------------|
| Items                                                          | Cost* (UDS/t) | Descriptions                        |
| <b>I. Total Operation Cost</b>                                 | <b>10817</b>  |                                     |
| A. Direct Production Costs                                     | 8794          |                                     |
| 1. Raw Materials                                               | 2568          |                                     |
| Lignin                                                         | 2551          |                                     |
| Water                                                          | 17            |                                     |
| 2. Operating Labor                                             | 1728          | 10% Total Product Cost              |
| 3. Direct Supervisory                                          | 346           | 20% Operating Labor                 |
| 4. Utilities                                                   | 2593          | 15% Total Product Cost              |
| 5. Maintenance and Repairs                                     | 904           | 3% Fixed-Capital Investment         |
| 6. Operating Supplies                                          | 136           | 15% Maintenance and Repairs         |
| 7. Laboratory Charges                                          | 173           | 10% Operating Labor                 |
| 8. Patents and Royalties                                       | 346           | 2% Total Product Cost               |
| B. Fixed Charges                                               | 813           |                                     |
| 1. Local Taxes                                                 | 602           | 2% Fixed-Capital Investment         |
| 2. Insurance                                                   | 211           | 0.5% Fixed-Capital Investment       |
| C. Plant-Overhead Costs                                        | 1210          | 70% Operating Labor                 |
| <b>II. Depreciation</b>                                        | <b>3012</b>   | <b>10% Fixed-Capital Investment</b> |
| <b>III. General Expenses</b>                                   | <b>3456</b>   |                                     |
| A. Administrative Costs                                        | 519           | 3% Total Product Cost               |
| B. Distribution Costs                                          | 1296          | 7.5% Total Product Cost             |
| C. R&D Costs                                                   | 864           | 5% Total Product Cost               |
| D. Financing                                                   | 778           | 4.5% Total Product Cost             |
| <b>IV. Total Product Cost</b>                                  | <b>17285</b>  |                                     |
| <b>V. Minimum Product Selling Prices</b>                       | <b>26488</b>  |                                     |
| A. Residue Value                                               | 920           |                                     |
| B. Income Tax                                                  | 3037          | 30% Gross Earning                   |
| C. Return On Investment                                        | 7087          | 20% Total Capital Investment        |
| D. Gross Earning                                               | 9204          |                                     |

Notes: \* The cost to produce one ton carbon dots.

**Table S6** Estimation of Total product cost & minimum product selling prices of carbon dots production from **MODIFIED lignin**

| <b>Total Product Cost &amp; Minimum Product Selling Prices</b> |               |                                     |
|----------------------------------------------------------------|---------------|-------------------------------------|
| Items                                                          | Cost* (UDS/t) | Descriptions                        |
| <b>I. Total Operation Cost</b>                                 | <b>5984</b>   |                                     |
| A. Direct Production Costs                                     | 4963          |                                     |
| 1. Raw Materials                                               | 1716          |                                     |
| Lignin                                                         | 208           |                                     |
| Ethylenediamine                                                | 1274          |                                     |
| Formaldehyde                                                   | 230           |                                     |
| Water                                                          | 4.3           |                                     |
| 2. Operating Labor                                             | 922           | 10% Total Product Cost              |
| 3. Direct Supervisory                                          | 184           | 20% Operating Labor                 |
| 4. Utilities                                                   | 1383          | 15% Total Product Cost              |
| 5. Maintenance and Repairs                                     | 418           | 3% Fixed-Capital Investment         |
| 6. Operating Supplies                                          | 63            | 15% Maintenance and Repairs         |
| 7. Laboratory Charges                                          | 92            | 10% Operating Labor                 |
| 8. Patents and Royalties                                       | 184           | 2% Total Product Cost               |
| B. Fixed Charges                                               | 375           |                                     |
| 1. Local Taxes                                                 | 278           | 2% Fixed-Capital Investment         |
| 2. Insurance                                                   | 97            | 0.5% Fixed-Capital Investment       |
| C. Plant-Overhead Costs                                        | 645           | 70% Operating Labor                 |
| <b>II. Depreciation</b>                                        | <b>1392</b>   | <b>10% Fixed-Capital Investment</b> |
| <b>III. General Expenses</b>                                   | <b>1844</b>   |                                     |
| A. Administrative Costs                                        | 277           | 3% Total Product Cost               |
| B. Distribution Costs                                          | 692           | 7.5% Total Product Cost             |
| C. R&D Costs                                                   | 461           | 5% Total Product Cost               |
| D. Financing                                                   | 415           | 4.5% Total Product Cost             |
| <b>IV. Total Product Cost</b>                                  | <b>9220</b>   |                                     |
| <b>V. Minimum Product Selling Prices</b>                       | <b>13854</b>  |                                     |
| A. Residue Value                                               | 47            |                                     |
| B. Income Tax                                                  | 1404          | 30% Gross Earning                   |
| C. Return On Investment                                        | 3276          | 20% Total Capital Investment        |
| D. Gross Earning                                               | 4633          |                                     |

Notes: \* The cost to produce one ton carbon dots.

**Table S7** Mass balance of carbon dots production from **RAW lignin**

| Stream    | Description                   | Solid | water | Total |
|-----------|-------------------------------|-------|-------|-------|
| S1 Lignin | Dried raw lignin              | 1.02  | 0.00  | 1.02  |
| S1 Water  | Water added                   | 0.00  | 25.5  | 25.5  |
| S2        | Products to filter            | 1.02  | 25.5  | 26.5  |
| S3        | Filtered carbon dots solution | 0.100 | 23.7  | 23.8  |
| S4        | Wet residue                   | 0.920 | 1.84  | 2.76  |
| S5        | Dried residue                 | 0.920 | 0.102 | 1.02  |
| S6        | Purified carbon dots          | 0.100 | 0.300 | 0.400 |

**Table S8** Mass balance of carbon dots production from **MODIFIED lignin**

| Stream              | Description                   | Solid   | Solvent | Total   |
|---------------------|-------------------------------|---------|---------|---------|
| A1. Water           | Feed                          | 0.000   | 0.147   | 0.147   |
| A1. Lignin          | Feed                          | 0.0834  | 0.0000  | 0.0834  |
| A1. Ethylenediamine | Feed                          | 0.0425  | 0.0000  | 0.0425  |
| A1. Formaldehyde    | Feed                          | 0.0212  | 0.0361  | 0.0574  |
| A2                  | Modified lignin slurry        | 0.147   | 0.333   | 0.481   |
| A3. Ethylenediamine | Recovered ethylenediamine     | 0.0109  | 0.0000  | 0.0109  |
| A3. Formaldehyde    | Recovered formaldehyde        | 0.00545 | 0.00000 | 0.00545 |
| A3. Water           | Recovered water               | 0.000   | 0.186   | 0.186   |
| S1 Lignin           | Modified lignin               | 0.147   | 0.147   | 0.294   |
| S1 Water            | Water added                   | 0.000   | 3.53    | 3.53    |
| S2                  | Products to filter            | 0.147   | 3.53    | 3.68    |
| S3                  | Filtered carbon dots solution | 0.100   | 3.44    | 3.54    |
| S4                  | Wet residue                   | 0.0471  | 0.0941  | 0.141   |
| S5                  | Dried residue                 | 0.0471  | 0.0052  | 0.0523  |
| S6                  | Purified carbon dots          | 0.100   | 0.300   | 0.400   |

**Table S9** Estimation of capital investment cost of carbon dots production from **RAW lignin**

| <b>Capital Investment Cost</b>               |            |                               |
|----------------------------------------------|------------|-------------------------------|
| Items                                        | Cost (USD) | Descriptions                  |
| <b>I. Direct Costs</b>                       | 21487288   |                               |
| A. Equipment Installation                    | 16068754   |                               |
| 1. Purchased Equipment                       | 4671150    |                               |
| 2. Installation                              | 1868460    | 40% Purchased Equipment       |
| 3. Instrumentation and Controls              | 840806.9   | 18% Purchased Equipment       |
| 4. Piping                                    | 2102017    | 45% Purchased Equipment       |
| 5. Electrical                                | 1167787    | 25% Purchased Equipment       |
| B. Buildings, Process and Auxiliary          | 1868460    | 40% Purchased Equipment       |
| C. Service Facilities and Yard Improvements  | 3269805    | 70% Purchased Equipment       |
| D. Land                                      | 280269     | 6% Purchased Equipment        |
| <b>II. Indirect Costs</b>                    | 7677294    |                               |
| A. Engineering and Supervision               | 2410313    | 15% Direct Costs              |
| B. Construction Expense and Contractor's Fee | 2892376    | 18% Direct Costs              |
| C. Contingency                               | 2374605    | 10% Fixed-Capital Investment  |
| <b>III. Fixed-Capital Investment</b>         | 23746048   | Direct Costs + Indirect Costs |
| <b>IV. Working Capital</b>                   | 4190479    | 15% Total Capital Investment  |
| <b>V. Total Capital Investment</b>           | 27936527   |                               |



**Table S10** Estimation of capital investment cost of carbon dots production from **MODIFIED lignin**

| <b>Capital Investment Cost</b>               |            |                               |
|----------------------------------------------|------------|-------------------------------|
| Items                                        | Cost (USD) | Descriptions                  |
| <b>I. Direct Costs</b>                       | 7428407    |                               |
| A. Equipment Installation                    | 4923479    |                               |
| 1. Purchased Equipment                       | 2159421    |                               |
| 2. Installation                              | 863768     | 40% Purchased Equipment       |
| 3. Instrumentation and Controls              | 388696     | 18% Purchased Equipment       |
| 4. Piping                                    | 971739     | 45% Purchased Equipment       |
| 5. Electrical                                | 539855     | 25% Purchased Equipment       |
| B. Buildings, Process and Auxiliary          | 863768     | 40% Purchased Equipment       |
| C. Service Facilities and Yard Improvements  | 1511594    | 70% Purchased Equipment       |
| D. Land                                      | 129565     | 6% Purchased Equipment        |
| <b>II. Indirect Costs</b>                    | 3549128    |                               |
| A. Engineering and Supervision               | 1114261    | 15% Direct Costs              |
| B. Construction Expense and Contractor's Fee | 1337113    | 18% Direct Costs              |
| C. Contingency                               | 1097753    | 10% Fixed-Capital Investment  |
| <b>III. Fixed-Capital Investment</b>         | 10977534   | Direct Costs + Indirect Costs |
| <b>IV. Working Capital</b>                   | 1937212    | 15% Total Capital Investment  |
| <b>V. Total Capital Investment</b>           | 12914746   |                               |

## References

1. Xue, B., Y. Yang, Y. Sun, J. Fan, X. Li, and Z. Zhang, Photoluminescent lignin hybridized carbon quantum dots composites for bioimaging applications. *Int. J. Biol. Sci.* 2019, 122: 954-61. DOI: 10.1016/j.ijbiomac.2018.11.018.
2. Ding, Z., F. Li, J. Wen, X. Wang, and R. Sun, Gram-scale synthesis of single-crystalline graphene quantum dots derived from lignin biomass. *Green Chem.* 2018, 20(6): 1383-90. DOI: 10.1039/C7GC03218H.
3. Chen, W., C. Hu, Y. Yang, J. Cui, and Y. Liu, Rapid synthesis of carbon dots by hydrothermal treatment of lignin. *Materials* 2016, 9(3): 184. DOI: 10.3390/ma9030184.
4. Zhang, B., Y. Liu, M. Ren, W. Li, X. Zhang, R. Vajtai, P.M. Ajayan, J.M. Tour, and L. Wang, Sustainable synthesis of bright green fluorescent nitrogen-doped carbon quantum dots from alkali lignin. *ChemSusChem* 2019, 12(18): 4202-10. DOI: 10.1002/cssc.201901693.
5. Niu, N., Z. Ma, F. He, S. Li, J. Li, S. Liu, and P. Yang, Preparation of Carbon Dots for Cellular Imaging by the Molecular Aggregation of Cellulolytic Enzyme Lignin. *Langmuir* 2017, 33(23): 5786-95. DOI: 10.1021/acs.langmuir.7b00617.
6. Yang, X., Y. Guo, S. Liang, S. Hou, T. Chu, J. Ma, X. Chen, J. Zhou, and R. Sun, Preparation of sulfur-doped carbon quantum dots from lignin as a sensor to detect Sudan I in an acidic environment. *J. Mater. Chem. B* 2020, 8(47): 10788-96. DOI: 10.1039/D0TB00125B.
7. Jiang, X., Y. Shi, X. Liu, M. Wang, P. Song, F. Xu, and X. Zhang, Synthesis of Nitrogen-Doped Lignin/DES Carbon Quantum Dots as a Fluorescent Probe for the Detection of Fe<sup>3+</sup> Ions. *Polymers* 2018, 10(11): 1282. DOI: 10.3390/polym10111282.
8. Shi, Y., X. Liu, M. Wang, J. Huang, X. Jiang, J. Pang, F. Xu, and X. Zhang, Synthesis of N-doped carbon quantum dots from bio-waste lignin for selective iron detection and cellular imaging. *Int. J. Biol. Sci.* 2019, 128: 537-45. DOI: 10.1016/j.ijbiomac.2019.01.146.
9. Li, Y., J. Ren, R. Sun, and X. Wang, Fluorescent lignin carbon dots for reversible responses to high-valence metal ions and its bioapplications. *J. Biomed. Nanotechnol.* 2018, 14(9): 1543-55. DOI: 10.1166/jbn.2018.2610.
10. Gao, X., X. Zhou, Y. Ma, T. Qian, C. Wang, and F. Chu, Facile and cost-effective preparation of carbon quantum dots for Fe<sup>3+</sup> ion and ascorbic acid detection in living cells based on the "on-off-on" fluorescence principle. *Appl. Surf. Sci.* 2019, 469: 911-16. DOI: 10.1016/j.apsusc.2018.11.095.
11. Xu, L., W. Mao, J. Huang, S. Li, K. Huang, M. Li, J. Xia, and Q. Chen, Economical, green route to highly fluorescence intensity carbon materials based on ligninsulfonate/graphene quantum dots composites: Application as excellent fluorescent sensing platform for detection of Fe<sup>3+</sup> ions. *Sensors and Actuators B: Chemical* 2016, 230: 54-60. DOI: 10.1016/j.snb.2015.12.043.
12. Myint, A.A., W.-K. Rhim, J.-M. Nam, J. Kim, and Y.-W. Lee, Water-soluble, lignin-derived carbon dots with high fluorescent emissions and their applications in bioimaging. *Journal of Industrial and Engineering Chemistry* 2018, 66: 387-95. DOI: 10.1016/j.jiec.2018.06.005.
13. Rai, S., B.K. Singh, P. Bhartiya, A. Singh, H. Kumar, P.K. Dutta, and G.K. Mehrotra, Lignin derived reduced fluorescence carbon dots with theranostic approaches: Nano-drug-carrier and bioimaging. *J. Lumin.* 2017, 190: 492-503. DOI: 10.1016/j.jlumin.2017.06.008.
14. Sun, L., Z. Mo, Q. Li, D. Zheng, X. Qiu, and X. Pan, Facile synthesis and performance of pH/temperature dual-response hydrogel containing lignin-based carbon dots. *Int. J. Biol. Sci.* 2021, 175: 516-25. DOI: 10.1016/j.ijbiomac.2021.02.049.
15. Zhao, Y., S. Jing, X. Peng, Z. Chen, Y. Hu, H. Zhuo, R. Sun, and L. Zhong, Synthesizing green carbon dots with exceptionally high yield from biomass hydrothermal carbon. *Cellulose* 2020, 27(1): 415-28. DOI: 10.1007/s10570-019-02807-0.
16. Rodríguez-Padrón, D., M. Algarra, L.A.C. Tarelho, J. Frade, A. Franco, G. de Miguel, J. Jiménez, E. Rodríguez-

- Castellón, and R. Luque, Catalyzed microwave-assisted preparation of carbon quantum dots from lignocellulosic residues. *ACS Sustainable Chem. Eng.* 2018, 6(6): 7200-05. DOI: 10.1021/acssuschemeng.7b03848.
17. Zhao, S., X. Song, X. Chai, P. Zhao, H. He, and Z. Liu, Green production of fluorescent carbon quantum dots based on pine wood and its application in the detection of Fe<sup>3+</sup>. *J. Clean. Prod.* 2020, 263: 121561. DOI: 10.1016/j.jclepro.2020.121561.
  18. Alam, A.-M., B.-Y. Park, Z.K. Ghouri, M. Park, and H.-Y. Kim, Synthesis of carbon quantum dots from cabbage with down- and up-conversion photoluminescence properties: Excellent imaging agent for biomedical applications. *Green Chem.* 2015, 17(7): 3791-97. DOI: 10.1039/C5GC00686D.
  19. Su, H., Z. Bi, Y. Ni, and L. Yan, One-pot degradation of cellulose into carbon dots and organic acids in its homogeneous aqueous solution. *Energy Environ. Sci.* 2019, 4(4): 391-99. DOI: 10.1016/j.gee.2019.01.009.
  20. Liu, Y., C. Zhu, Y. Gao, L. Yang, J. Xu, X. Zhang, C. Lu, Y. Wang, and Y. Zhu, Biomass-derived nitrogen self-doped carbon dots via a simple one-pot method: Physicochemical, structural, and luminescence properties. *Appl. Surf. Sci.* 2020, 510: 145437. DOI: 10.1016/j.apsusc.2020.145437.
  21. Joseph, J. and A.A. Anappara, Microwave-assisted hydrothermal synthesis of UV-emitting carbon dots from tannic acid. *New J. Chem.* 2016, 40(9): 8110-17. DOI: 10.1039/C6NJ02107G.
